# Supplementary material for: Inhibition of cartilage degeneration and subchondral bone deterioration by Spinacia oleracea in human mimic of ACLT-induced osteoarthritis
Source: Royal Society of Chemistry journal article supplement (doi:10.1039/d0fo01125h), 2020-01-01
Supplement: d0fo01125h2.pdf [file d0fo01125h2.pdf]

**Table 1. Summary Data UHPLC-PDA/MS analysis**

| <b>Sr. No</b> | <b>Code</b> | <b>Compound Name</b>                                           | <b>Standard RT</b> | <b>Sample RT</b> | <b>Observe UV Max</b> | <b>Actual Mass</b> | <b>Observed Mass (M+H)</b> |
|---------------|-------------|----------------------------------------------------------------|--------------------|------------------|-----------------------|--------------------|----------------------------|
| 1             | M1          | 20 $\beta$ -Hydroxyecdysone                                    | 2.49               | 2.50             | 247                   | 480.00             | 481.60                     |
| 2             | M2          | Kaempferitrin                                                  | 2.92               | 2.86             | 342,264               | 578.50             | 579.50                     |
| 3             | M3          | 5,3',4'-Trihydroxy-3-methoxy-6,7-methylenedioxy-4' glucuronide | 5.26               | 5.26             | 339                   | 520.00             | 521.40                     |
| 4             | M4          | 5,7,3',4'-Tetrahydroxy-3,6-dimethoxyflavone                    | 5.50               | 5.47             | 348                   | 346.00             | 347.40                     |
| 5             | M5          | 5,3',4'-Trihydroxy-3-methoxy-6,7-methylenedioxyflavone         | 6.81               | 6.79             | 351                   | 344.00             | 345.35                     |
